# Supplementary material for: Impact of Water Exposure and Temperature Changes on Skin Barrier Function
Source: MDPI journal article supplement (doi:10.3390/jcm11020298), 2022-01-07
Supplement: s1 [file s1]

**Table S1.** Changes in skin barrier function after cold and hot water exposure

|                                               | <b>Basal</b>         | <b>Cold water</b>    | <b>Hot water</b>     | <b>p<sup>B-C</sup></b> | <b>p<sup>B-H</sup></b> | <b>p<sup>C-H</sup></b> |
|-----------------------------------------------|----------------------|----------------------|----------------------|------------------------|------------------------|------------------------|
| <b>Temperature (°C)</b>                       | 30.18<br>(1.84 SD)   | 23.49<br>(2.59 SD)   | 32.60<br>(1.21 SD)   | <0.001                 | <0.001                 | <0.001                 |
| <b>pH</b>                                     | 6.33<br>(0.37 SD)    | 6.62<br>(0.30 SD)    | 6.65<br>(0.29 SD)    | <0.001                 | <0.001                 | 0.369                  |
| <b>Erythema (AU)</b>                          | 249.45<br>(57.25 SD) | 253.63<br>(56.78 SD) | 286.34<br>(55.88 SD) | 0.603                  | <0.001                 | <0.001                 |
| <b>TEWL (g·h<sup>-1</sup>·m<sup>-2</sup>)</b> | 25.75<br>(12.40 SD)  | 34.96<br>(8.54 SD)   | 58.58<br>(10.25 SD)  | <0.001                 | <0.001                 | <0.001                 |
| <b>SCH (AU)</b>                               | 46.69<br>(18.73 SD)  | 50.55<br>(14.90 SD)  | 44.50<br>(13.91 SD)  | 0.040                  | 0.324                  | 0.004                  |

AU, arbitrary units; SCH, stratum corneum hydration; TEWL, transepidermal water loss.

Data are expressed as means (standard deviations, SD).

<sup>B-C</sup> *p*-value after using Student's *t*-test for paired samples to compare skin barrier function between baseline and after cold water exposure.

<sup>B-H</sup> *p*-value after using Student's *t*-test for paired samples to compare skin barrier function between baseline and after hot water exposure.

<sup>C-H</sup> *p*-value after using Student's *t*-test for paired samples to compare skin barrier function after cold and hot water exposure.

**Table S2.** Changes in skin barrier function after TempTest

|                                               | <b>Basal</b>            | <b>4°C<br/>TempTest</b> | <b>44°C<br/>TempTest</b> | <b>p<sup>B-C</sup></b> | <b>p<sup>B-H</sup></b> | <b>p<sup>C-H</sup></b> |
|-----------------------------------------------|-------------------------|-------------------------|--------------------------|------------------------|------------------------|------------------------|
| <b>Temperature<br/>(°C)</b>                   | 30.76<br>(1.24 SD)      | 25.35<br>(2.18SD)       | 32.45<br>(1.45 SD)       | <0.001                 | <0.001                 | <0.001                 |
| <b>pH</b>                                     | 6.27<br>(0.37 SD)       | 6.28<br>(0.36 SD)       | 6.25<br>(0.36 SD)        | 0.435                  | 0.419                  | 0.132                  |
| <b>Erythema (AU)</b>                          | 210.45<br>(60.85<br>SD) | 209.07<br>(64.50 SD)    | 227.79<br>(60.20 SD)     | 0.847                  | 0.001                  | 0.017                  |
| <b>TEWL (g·h<sup>-1</sup>·m<sup>-2</sup>)</b> | 7.99<br>(3.39 SD)       | 8.74<br>(3.58 SD)       | 9.98<br>(3.86 SD)        | 0.145                  | <0.001                 | 0.003                  |
| <b>SCH (AU)</b>                               | 37.77<br>(12.94<br>SD)  | 39.51<br>(11.60 SD)     | 38.01<br>(11.95 SD)      | 0.077                  | 0.847                  | 0.121                  |

AU, arbitrary units; SCH, stratum corneum hydration; TEWL, transepidermal water loss.

Data are expressed as means (standard deviations, SD).

<sup>B-C</sup> *p*-value after using Student's *t*-test for paired samples to compare skin barrier function between baseline and after 4°C TempTest exposure.

<sup>B-H</sup> *p*-value after using Student's *t*-test for paired samples to compare skin barrier function between baseline and after 44°C TempTest exposure.

<sup>C-H</sup> *p*-value after using Student's *t*-test for paired samples to compare skin barrier function after 4°C and 44°C TempTest exposure.
